# Supplementary material for: Efficient synthesis of stably adenylated DNA and RNA adapters for microRNA capture using T4 RNA ligase 1
Source: PubMed Central journal article supplement (PMC4620478; doi:10.1038/srep15620), 2015-10-26
Supplement: srep15620-s1.pdf [file srep15620-s1.pdf]

# Efficient synthesis of stable adenylated DNA and RNA adapters for microRNA capture using T4 RNA ligase 1

Yunke Song<sup>1</sup>, Kelvin J Liu<sup>2,3,\*</sup> and Tza-Huei Wang<sup>1,2,\*</sup>

<sup>1</sup> Biomedical Engineering Department, Johns Hopkins University, Baltimore, MD, 21218, USA

<sup>2</sup> Mechanical Engineering Department, Johns Hopkins University, Baltimore, MD, 21218, USA

<sup>3</sup> Circulomics Inc, Baltimore, MD, 21211, USA

\*To whom correspondence should be addressed: Tel: +1 410 516 7086; Fax: +1 410 516 7254; Email: thwang@jhu.edu. Correspondence may also be addressed to: Tel: + 1 626 202 4825; Email:

[kliu@circulomics.com](mailto:kliu@circulomics.com)

## Supplementary Data

| Name                 | Sequence 5' -> 3'                                                                           |
|----------------------|---------------------------------------------------------------------------------------------|
| dA                   | 5' - /5Phos/ACTGTAGGCACCATCAATC/3Cy5Sp/ - 3'                                                |
| dT                   | 5' - /5Phos/TCTGTAGGCACCATCAATC/3Cy5Sp/ - 3'                                                |
| dG                   | 5' - /5Phos/GCTGTAGGCACCATCAATC/3Cy5Sp/ - 3'                                                |
| dC                   | 5' - /5Phos/CCTGTAGGCACCATCAATC/3Cy5Sp/ - 3'                                                |
| rA                   | 5' - /5Phos/rACTGTAGGCACCATCAATC/3Cy5Sp/ - 3'                                               |
| rU                   | 5' - /5Phos/rUCTGTAGGCACCATCAATC/3Cy5Sp/ - 3'                                               |
| rG                   | 5' - /5Phos/rGCTGTAGGCACCATCAATC/3Cy5Sp/ - 3'                                               |
| rC                   | 5' - /5Phos/rCCTGTAGGCACCATCAATC/3Cy5Sp/ - 3'                                               |
| let-7a               | /5Cy3/rUrGrArGrGrUrArGrUrArGrGrUrUrGrUrArUrArGrUrU                                          |
| miR-16               | /5Cy3/rUrArGrCrArGrCrArCrGrUrArArArUrArUrUrGrGrCrG                                          |
| miR-21               | /5Cy3/rUrArGrCrUrUrArUrCrArGrArCrUrGrArUrGrUrUrGrA                                          |
| miR-26a              | /5Cy3/rUrUrCrArArGrUrArArUrCrCrArGrGrArUrArGrGrCrU                                          |
| miR-29b              | /5Cy3/rUrArGrCrArCrCrArUrUrUrGrArArArUrCrArGrUrGrUrU                                        |
| miR-34a              | /5Cy3/rUrGrGrCrArGrUrGrUrCrUrUrArGrCrUrGrGrUrUrGrU                                          |
| let-7a precursor DNA | /5Phos/TGGGATGAGGTAGTAGGTTGTATAGTTTTAGGGTCAC<br>ACCCACCACTGGGAGATAACTATACAATCTACTGTCTTTCTTA |

**Table S1.** List of oligonucleotide sequences.

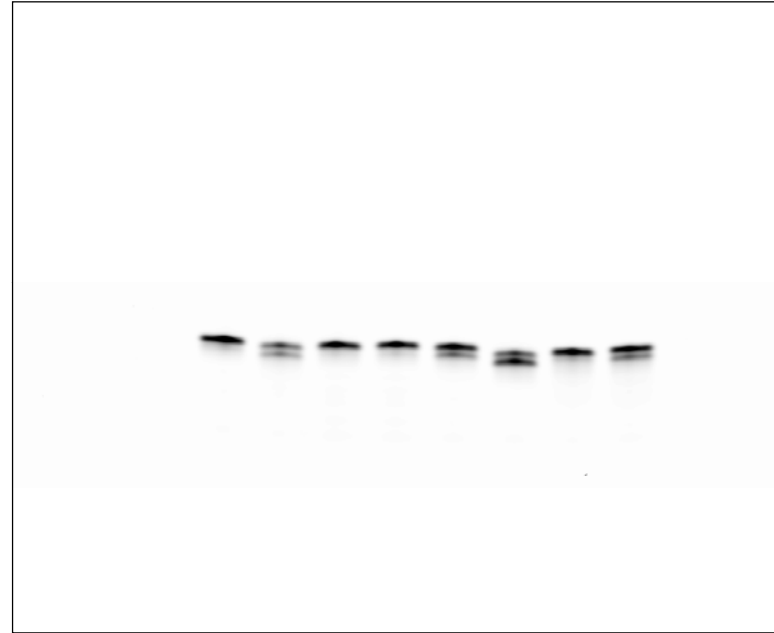

**Supplemental Figure S1.** Uncropped gel image of Figure 1b

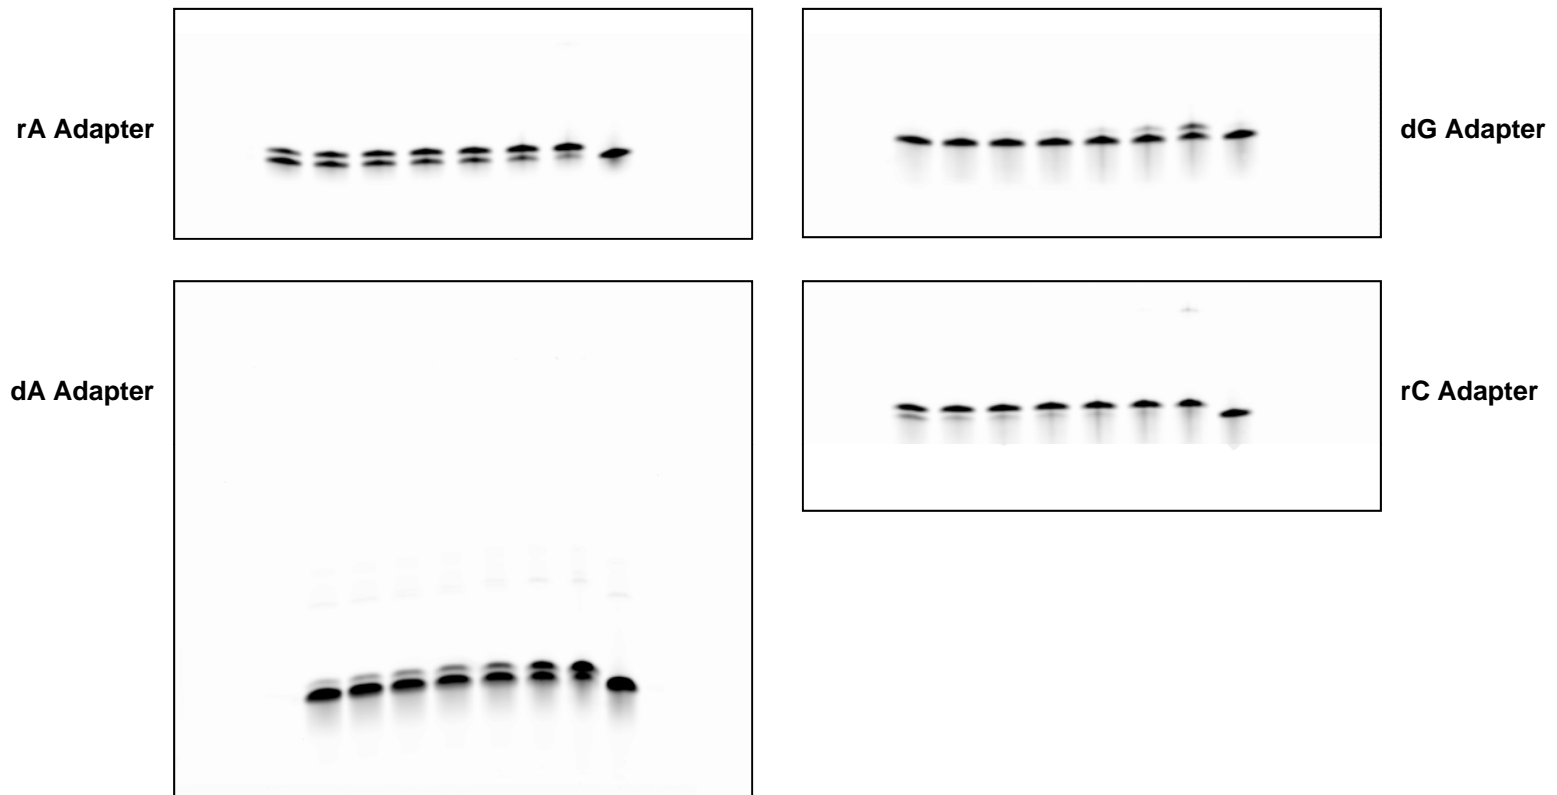

**Supplemental Figure S2.** Uncropped gel images of Figure 1c.

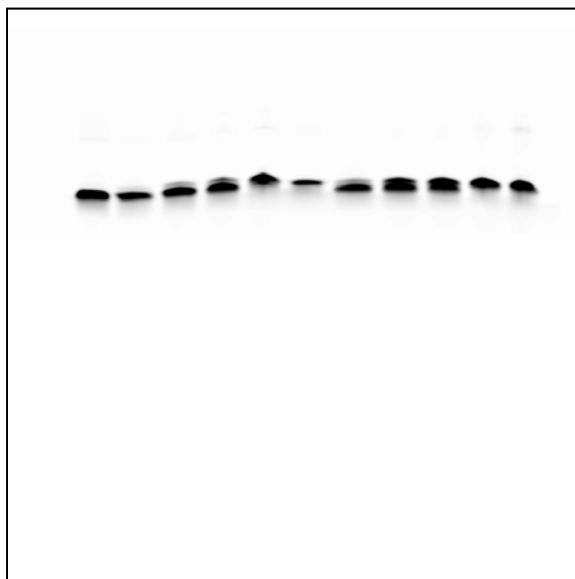

**Supplemental Figure S3.** Uncropped gel image of Figure 1d

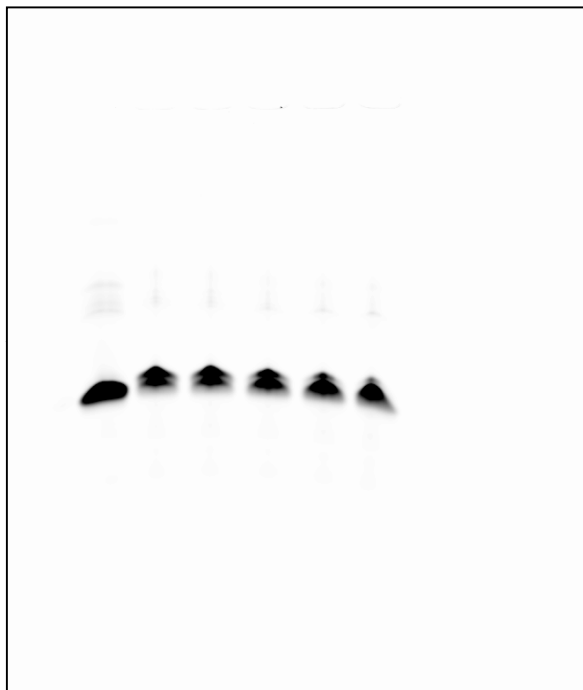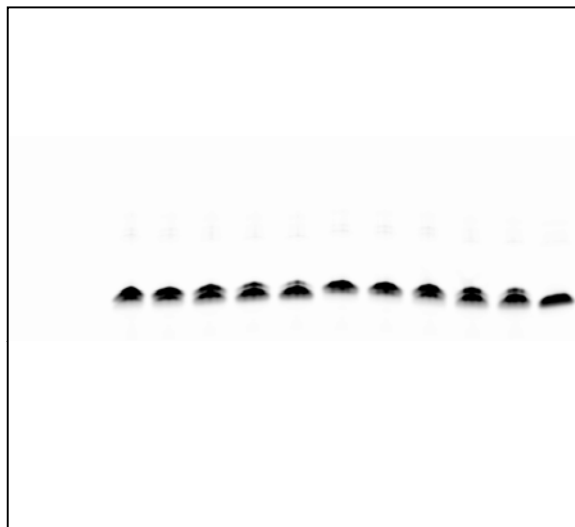

**Supplemental Figure S4.** Uncropped gel images of Figure 2a

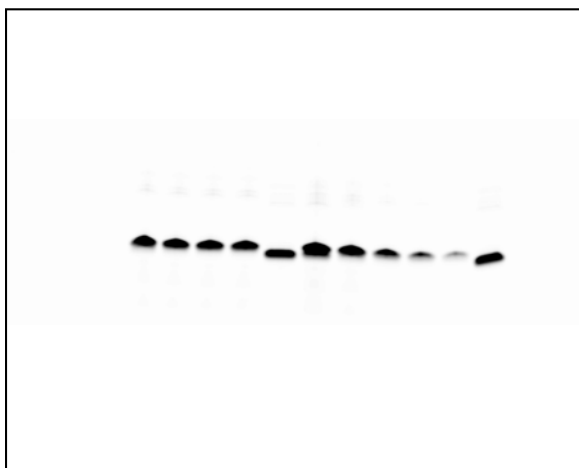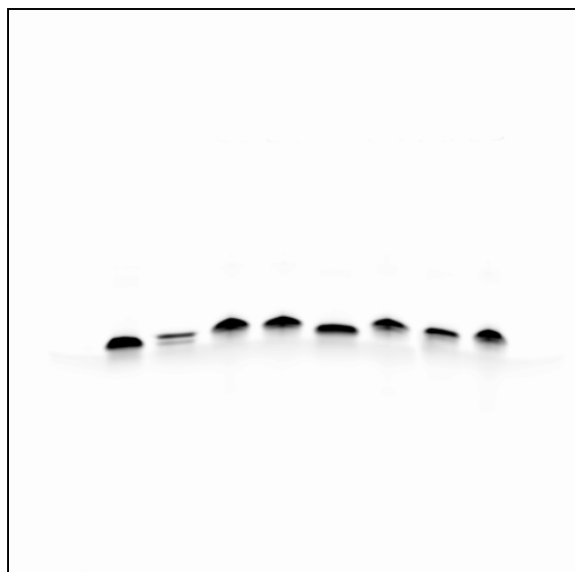

**Supplemental Figure S5.** Uncropped gel images of Figure 2b and Figure 2d.

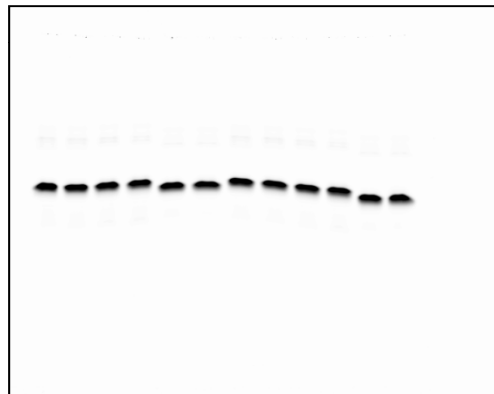

**Supplemental Figure S6.** Uncropped gel image of Figure 2c



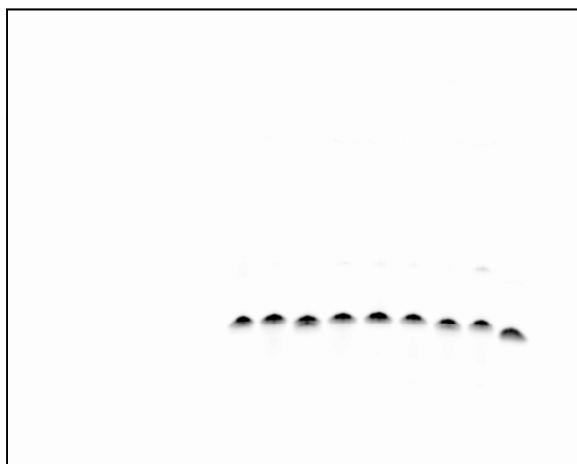

**Supplemental Figure S7.** Uncropped gel image of Figure 3

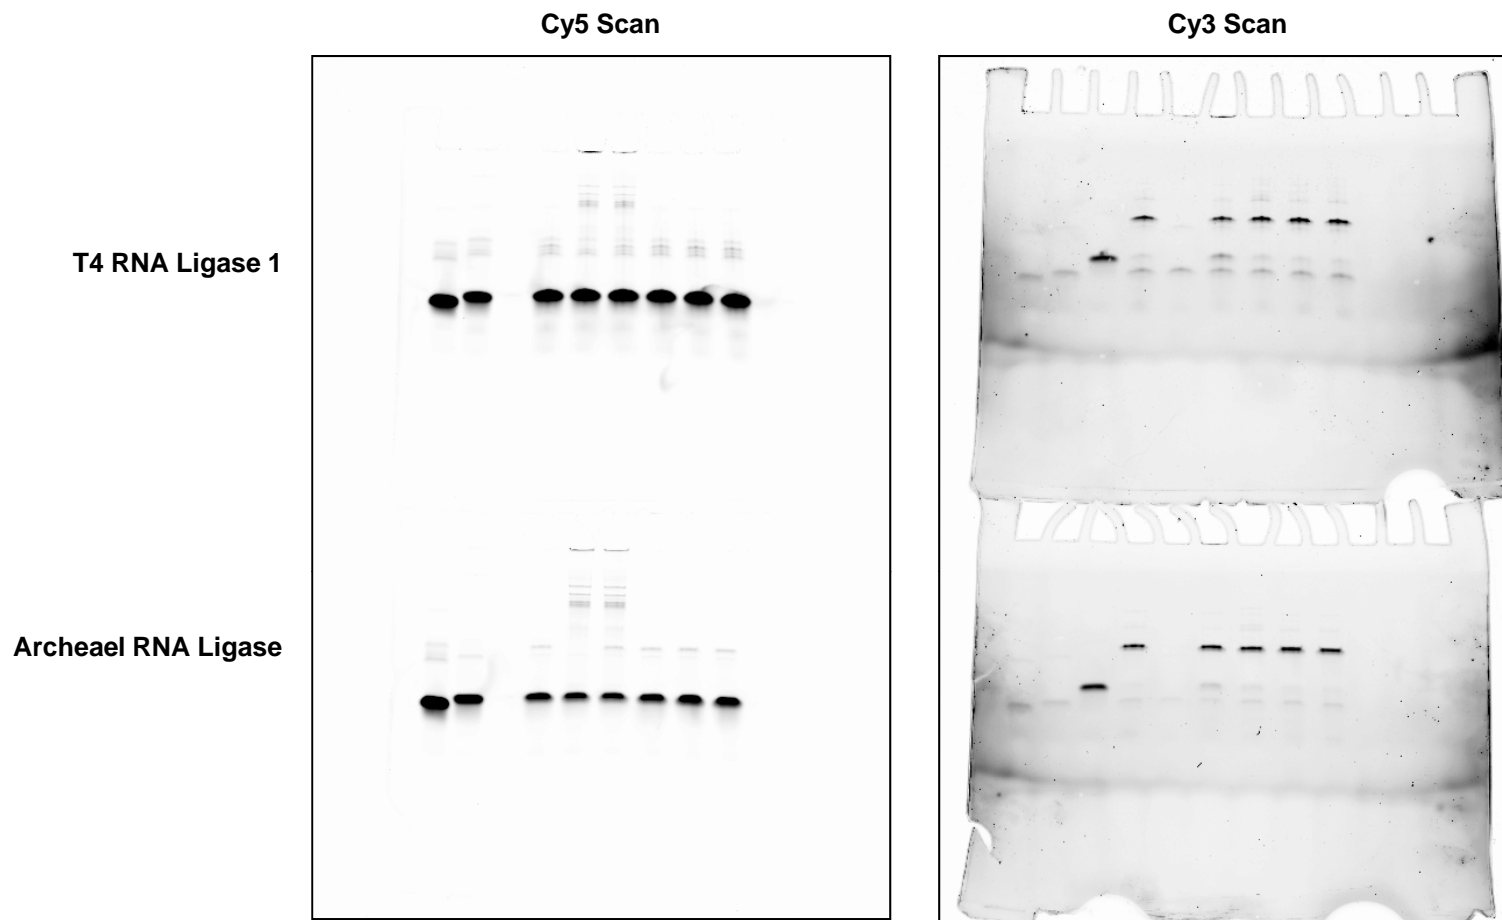

**Supplemental Figure S8.** Uncropped gel image of Figure 4a and Figure 4c

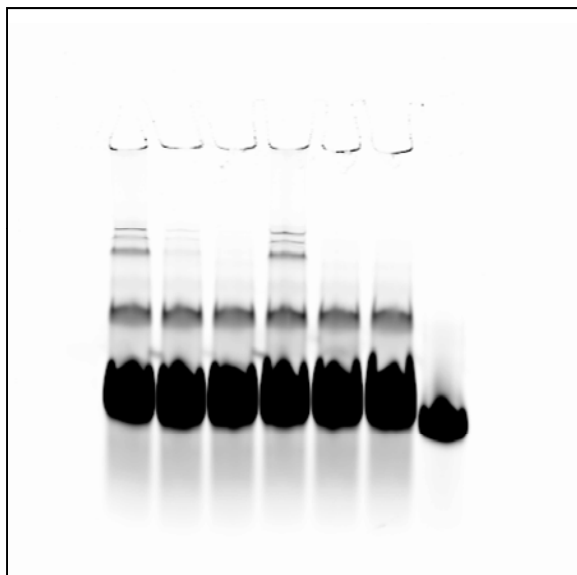

**Supplemental Figure S9.** Uncropped gel image of Figure 4b

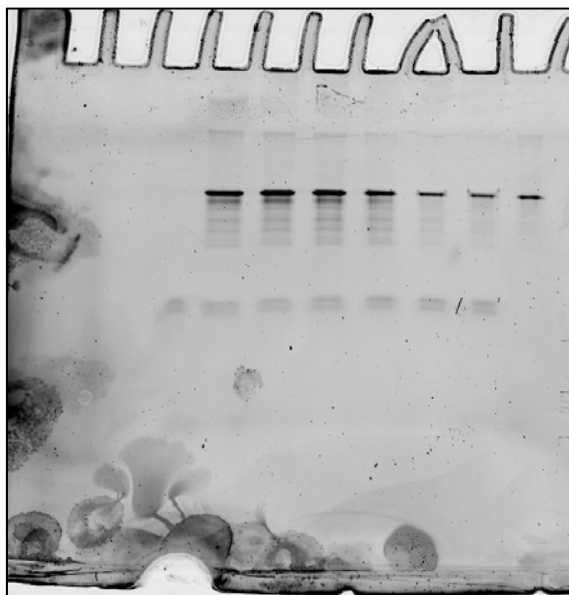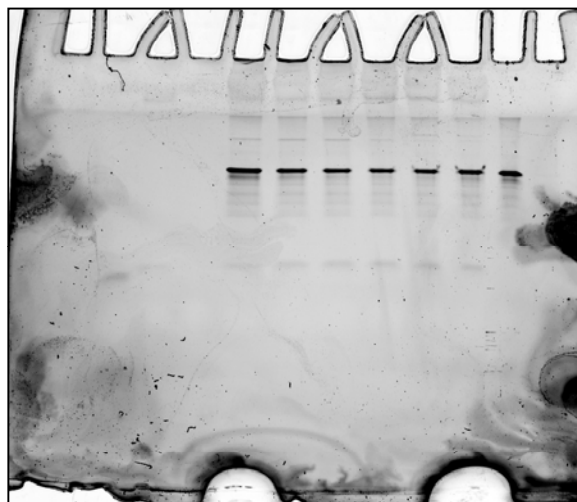

**Supplemental Figure S10.** Uncropped gel image of Figure 5
